# Supplementary material for: Fenton reaction-mediated fluorescence quenching of N-acetyl-l-cysteine-protected gold nanoclusters: analytical applications of hydrogen peroxide, glucose, and catalase detection
Source: Royal Society of Chemistry journal article supplement (doi:10.1039/c5an01284h), 2015-01-01
Supplement: c5an01284h1.pdf [file c5an01284h1.pdf]

### Supporting Information

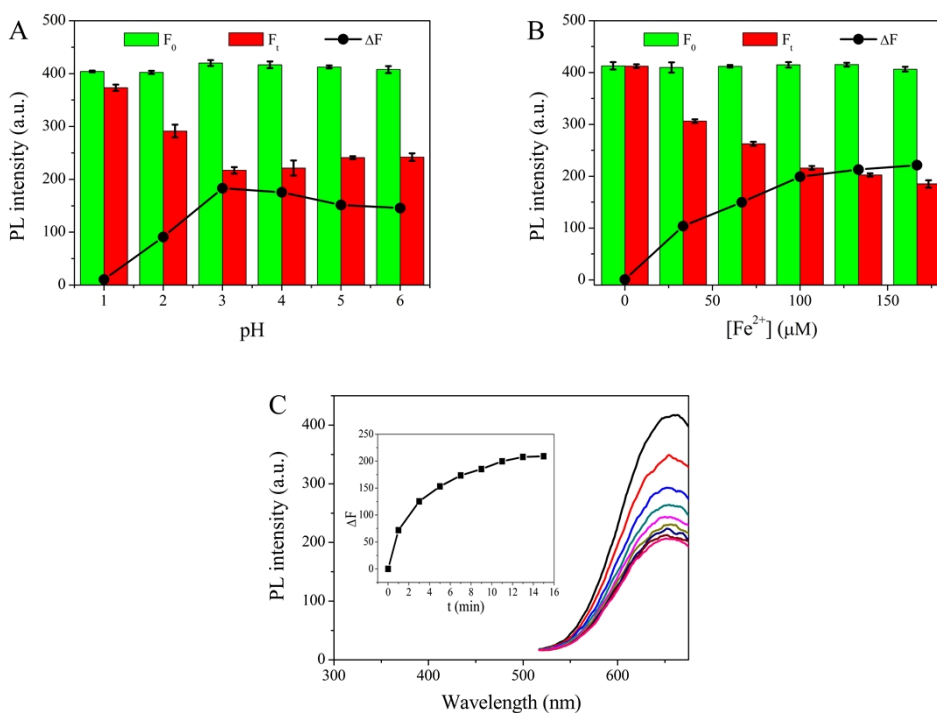

**Fig. S1** Effects of (A) pH, (B) Fe<sup>2+</sup> concentration, and (C) reaction time on the fluorescence response of NAC-AuNCs. The concentrations of H<sub>2</sub>O<sub>2</sub> used in above experiments are all 4.44 μM.

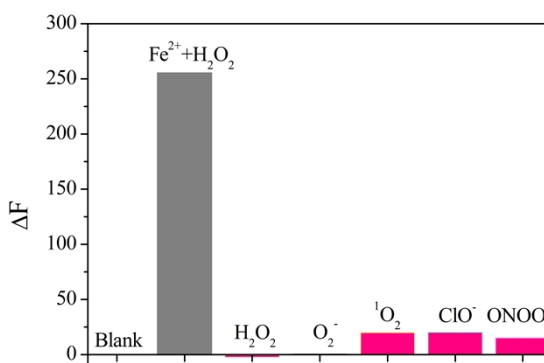

**Fig. S2** Fluorescence responses of NAC-AuNCs toward ROS (6.66 μM).
